# Supplementary material for: MYO5B mutations in pheochromocytoma/paraganglioma promote cancer progression
Source: PubMed Central journal article supplement (PMC7329139; doi:10.1371/journal.pgen.1008803), 2020-06-08
Supplement: pgen.1008803.s004.pdf [file pgen.1008803.s004.pdf]

**S1 Table. Gene-set for variant calling in PPGL**

| Gene     | Inclusion criteria and reference |
|----------|----------------------------------|
| AHNAK2   | Recurrent [14,70,72]             |
| ARNT     | Somatic [4]                      |
| ATRX*    | Recurrent [14,18,70,72]          |
| BRAF     | Somatic [4]                      |
| CSDE1    | Somatic [4]                      |
| DLST     | Germline [13]                    |
| DNAH17   | Recurrent [14,70,72]             |
| DNMT3A   | Germline [12]                    |
| EGLN1    | Germline [4]                     |
| EGLN2    | Germline [15]                    |
| EPAS1 *  | Somatic [4]                      |
| FGFR1    | Somatic [4]                      |
| FH*      | Germline [7]                     |
| HRAS*    | Somatic [4, 14]                  |
| IDH1     | Somatic [4]                      |
| KIF1B    | Germline [77]                    |
| KMT2B    | Somatic [14,73]                  |
| MAML3    | Somatic [4]                      |
| MAX*     | Germline [4, 7]                  |
| MDH2     | Germline [10]                    |
| MYCN     | Recurrent [14]                   |
| MYO5A    | MYO5 homolog                     |
| MYO5B    | Recurrent [14]                   |
| MYO5C    | MYO5 homolog                     |
| MYO9B    | Recurrent [70]                   |
| NF1*     | Germline & Somatic [4,7,14]      |
| RET*     | Germline & Somatic [4,7]         |
| SDHA*    | Germline [7]                     |
| SDHAF2*  | Germline [7]                     |
| SDHAF3   | Germline [71]                    |
| SDHB*    | Germline [4, 7]                  |
| SDHC*    | Germline [7]                     |
| SDHD*    | Germline [4, 7]                  |
| SETD2    | Somatic [4]                      |
| SLC25A11 | Germline [9]                     |
| TERT     | Somatic [11]                     |
| TMEM127* | Germline [4,7]                   |
| TP53     | Somatic [4]                      |
| VCL      | Recurrent [14]                   |
| VHL*     | Germline & Somatic [4,7]         |

The 40 genes for calling of mutations in exomes were selected based on the following criteria; previously established or reported with germline and/or recurrent somatic mutations in PPGL (Buffet 2018 [9], Cascon 2015 [10], Dahia 2014 [7], Dwight 2017 [71], Fishbein 2017 [4], Papatomas 2014 [11], Remacha 2018 [12], Remacha 2019 [13], Yang 2015 [15], Yeh [77]), or recurrently occurring genes between lists of several PPGL studies (Castro-Vega 2015 [70], Flynn 2015 [72], Juhlin 2015 [73], Fishbein 2015 [18]), or recurrently mutated within our previous study (Wilzén 2016 [14]). Also, *MYO5B*-paralogs *MYO5A* and *MYO5C* were included. The 14 most commonly mutated genes in PPGL are marked with a star (\*).
