# Supplementary material for: MYO5B mutations in pheochromocytoma/paraganglioma promote cancer progression
Source: PubMed Central journal article supplement (PMC7329139; doi:10.1371/journal.pgen.1008803), 2020-06-08
Supplement: pgen.1008803.s005.pdf [file pgen.1008803.s005.pdf]

**S2 Table. Mutation analysis in 40 PPGL-associated genes**

| Case ID | Exome analysis | Exome pipeline   | Major variant                                 | Present in Database | AF                        | Germline/Somatic | Other variants                                                                                                       | AF                         | Germline/Somatic                           |
|---------|----------------|------------------|-----------------------------------------------|---------------------|---------------------------|------------------|----------------------------------------------------------------------------------------------------------------------|----------------------------|--------------------------------------------|
| CPN1    | Paired (T & N) | SureSelect v.3/5 | NF1 NM_001042492:c.7673delA, p.E2558fs        |                     | 0.2650 (T)                | Somatic          | MYO5A NM_000259:c.2777A>G, p.E926G                                                                                   | 0.2933                     | Somatic (T)                                |
| CPN2    | Paired (T & N) | SureSelect v.3/5 | RET NM_020975.4:c.1900T>C, p.C634R            | ClinVar             | 0.4875 (N)<br>0.5820 (T)  | Germline         |                                                                                                                      |                            |                                            |
| CPN3    | Paired (T & N) | SureSelect v.3/5 | SDHB NM_003000.2:c.688C>T, p.R230C            | ClinVar             | 0.5306 (N)<br>0.71111 (T) | Germline         |                                                                                                                      |                            |                                            |
| CPN4    | Paired (T & N) | SureSelect v.3/5 | SDHA NM_004168.3:c.-7A>C, p.?                 | HGMD                | 0.5 (N)<br>nd (T)         | Germline         |                                                                                                                      |                            |                                            |
| CPN6    | Paired (T & N) | SureSelect v.3/5 | SDHB NM_003000.2:c.418G>T, p.V140F            | ClinVar             | 0.4080<br>0.7523 (T)      | Germline         | MYCN NM_005378:c.C173C>T, p.T58M<br>VCL NM_003373:c.A692A>G, p.N231S                                                 | 0.5<br>0.3259              | Somatic (T)<br>Somatic (T)                 |
| CPN7    | Paired (T & N) | SureSelect v.3/5 | SDHB NM_003000.2:c.G600A, p.W200X             | ClinVar             | 0.4348 (N)<br>0.7907 (T)  | Germline         | MYO5B NM_001080467:c.T1760C, p.L587P<br>VCL NM_003373:c.757_771del, p.253_257del*                                    | 0.2453<br>0.1889           | Somatic (T)<br>Somatic (T)                 |
| CPN8    | Paired (T & N) | SureSelect v.3/5 | SDHB NM_003000.2:c.418G>T, p.V140F            | ClinVar             | 0.4439 (N)<br>0.6809 (T)  | Germline         | SLC25A11 NM_003562.4:c.598G>T, p.A200S<br>MYCN NM_005378:c.131C>T, p.P44L*<br>MYO5B NM_001080467:c.4831G>A, p.G1611S | 0.4636<br>0.0862<br>0.3103 | Germline (N)<br>Somatic (T)<br>Somatic (T) |
| CPN9    | Paired (T & N) | SureSelect v.3/5 | HRAS NM_001130442:c.35G>A, p.G12D             | ClinVar             | 0.4337 (T)                | Somatic          |                                                                                                                      |                            |                                            |
| CPN10   | Paired (T & N) | SureSelect v.3/5 | EPAS1 NM_001430:c.1589C>T, p.A530V            |                     | 0.4274 (T)                | Somatic          |                                                                                                                      |                            |                                            |
| CPN11   | Paired (T & N) | SureSelect v.3/5 | EPAS1 NM_001430:c.1589C>T, p.A530V            |                     | 0.4242 (T)                | Somatic          |                                                                                                                      |                            |                                            |
| CPN12   | Paired (T & N) | SureSelect v.3/5 | SDHB deletion ex1-8 (NM_003000.2)             |                     | app. 0.25 (T)             | Somatic          |                                                                                                                      |                            |                                            |
| CPN13   | Paired (T & N) | SureSelect v.3/5 | SDHB deletion ex1-8 (NM_003000.2)             |                     | app.0.45 (T)              | Somatic          |                                                                                                                      |                            |                                            |
| CPN14   | Paired (T & N) | SureSelect v.3/5 | SDHB NM_003000.2:c.725G>A, p.R242H            | ClinVar             | 0.3 (N)<br>0.7826 (T)     | Germline         |                                                                                                                      |                            |                                            |
| CPN15   | Paired (T & N) | SureSelect v.3/5 | nd                                            |                     |                           |                  |                                                                                                                      |                            |                                            |
| CPN123  | Paired (T & N) | CREv2 clinical   | SDHB NM_003000.2:c.688C>T, p.R230C            | ClinVar             | 0.4552 (N)<br>0.8081 (T)  | Germline         |                                                                                                                      |                            |                                            |
| CPN16   | Single (T)     | CREv2 clinical   | VHL NM_000551.3:c.392A>G, p.N131S             | HGMD                | 0.3436 (T)                | nd               |                                                                                                                      |                            |                                            |
| CPN17   | Single (T)     | CREv2 clinical   | nd                                            |                     |                           |                  |                                                                                                                      |                            |                                            |
| CPN18   | Single (T)     | CREv2 clinical   | VHL NM_000551.3:c.460C>A, p.P154T             | HGMD                | 0.6867 (T)                | nd               |                                                                                                                      |                            |                                            |
| CPN24   | Single (T)     | CREv2 clinical   | RET NM_020975.4:c.2753T>C, p.M918T            | ClinVar             | 0.3357 (T)                | nd               |                                                                                                                      |                            |                                            |
| CPN25   | Single (T)     | CREv2 clinical   | HRAS NM_176795.3:c.182A>G, p.Q61R             | ClinVar             | 0.4431 (T)                | nd               |                                                                                                                      |                            |                                            |
| CPN29   | Single (T)     | CREv2 clinical   | RET NM_020975.4:c.1902C>G, p.C634W            | ClinVar             | 0.3099 (T)                | nd               | ARNT NM_001286035.1:c.1171C>A, p.Q391K<br>MYO5A NM_000259.3:c.3581C>A, p.P1194Q                                      | 0.2272<br>0.2500           | nd<br>nd                                   |
| CPN30   | Single (T)     | CREv2 clinical   | RET NM_020975.4:c.2753T>C, p.M918T            | ClinVar             | 0.4286 (T)                | nd               | MYO9B NM_001130065.1:c.5176C>T, p.H1726Y                                                                             | 0.4589                     | nd                                         |
| CPN31   | Single (T)     | CREv2 clinical   | VHL NM_000551.3:c.250G>C, p.V84L              | ClinVar             | 0.5509 (T)                | nd               |                                                                                                                      |                            |                                            |
| CPN32   | Single (T)     | CREv2 clinical   | SDHB deletion ex1-8 (NM_003000.2)             |                     | app.0.3 (T)               | nd               |                                                                                                                      |                            |                                            |
| CPN42   | Single (T)     | CREv2 clinical   | SDHB deletion ex1-8 (NM_003000.2)             |                     | app.0.5 (T)               | nd               |                                                                                                                      |                            |                                            |
| CPN81   | Single (T)     | CREv2 clinical   | RET NM_020975.4:c.1826G>A, p.C609Y            | ClinVar;<br>HGMD    | 0.9752 (T)                | nd               |                                                                                                                      |                            |                                            |
| CPN90   | Single (T)     | CREv2 clinical   | VHL deletion ex1 (NM_003000.2)                |                     | app.0.5 (T)               | nd               |                                                                                                                      |                            |                                            |
| CPN93   | Single (T)     | CREv2 clinical   | SDHB deletion ex1-8 (NM_003000.2)             |                     | app.0.4 (T)               | nd               |                                                                                                                      |                            |                                            |
| CPN96   | Single (T)     | CREv2 clinical   | NF1 deletion ex1-ex58 (NM_001042492.2)        |                     | app.0.4 (T)               | nd               |                                                                                                                      |                            |                                            |
| CPN96   | Single (T)     | CREv2 clinical   | RET NM_020975.4:c.1900T>C, p.C634R            | ClinVar;<br>HGMD    | 0.5 (T)                   | nd               |                                                                                                                      |                            |                                            |
| CPN113  | Single (T)     | CREv2 clinical   | NF1 NM_001042492.2:c.1318delC, p.Arg440Efs*33 | ClinVar;<br>HGMD    | 0.6875 (T)                | nd               |                                                                                                                      |                            |                                            |

Mutation analysis by Exome sequencing and MLPA (see material and methods for details). Paired tumor tissue and normal samples (T & N) or single tumors samples (T) run by different library preparation kits (SureSelect v3 or v5 or Clinical research exome (CRE v2)). Variant filtering was performed by Alissa Interpret (Agilent Technologies) and somatic filtering in paired samples (T-N) was according to Wilzen et al., 2016 [14]. Major variant: pathogenic or likely pathogenic mutation in any of the 14 PPGL susceptibility genes and their allele frequency (AF) in normal and/or tumor sample. Present in Database: Variants previously reported in ClinVar ([www.ncbi.nlm.nih.gov/clinvar/](http://www.ncbi.nlm.nih.gov/clinvar/)) or HGMD ([portal.biobase-international.com](http://portal.biobase-international.com)) databases. Variants were defined as germline if occurring in the normal blood/tissue sample, and as somatic if only occurring in the tumor tissue sample. Other variants: secondary variants present in the 40-gene set occurring in AF>0.2, predicted to be damaging by at least 2 out of 3 functional prediction software (Polyphen, SIFT, and MutationTaster), and present <0.1% (germline) or 0% (somatic) in normal population databases. \*Variants previously reported in COSMIC were included at lower AF. nd=not determined.
