# Supplementary material for: MYO5B mutations in pheochromocytoma/paraganglioma promote cancer progression
Source: PubMed Central journal article supplement (PMC7329139; doi:10.1371/journal.pgen.1008803), 2020-06-08
Supplement: pgen.1008803.s006.pdf [file pgen.1008803.s006.pdf]

**S3 Table. Gene-set for expression clustering of PPGL tumors.**

| GeneSymbol | GeneName                                                                                         |
|------------|--------------------------------------------------------------------------------------------------|
| A2BP1      | ataxin 2-binding protein 1                                                                       |
| ABCC8      | ATP-binding cassette, sub-family C (CFTR/MRP), member 8                                          |
| ACTG2      | actin, gamma 2, smooth muscle, enteric                                                           |
| ACVR1C     | activin A receptor, type IC                                                                      |
| ADCYAP1    | adenylate cyclase activating polypeptide 1 (pituitary)                                           |
| AGRP       | agouti related protein homolog (mouse)                                                           |
| AK3L1      | adenylate kinase 3-like 1                                                                        |
| ANGPTL4    | angiopoietin-like 4                                                                              |
| ANK3       | ankyrin 3, node of Ranvier (ankyrin G)                                                           |
| APOLD1     | apolipoprotein L domain containing 1                                                             |
| AREG       | amphiregulin (schwannoma-derived growth factor)                                                  |
| BCAT1      | branched chain aminotransferase 1, cytosolic                                                     |
| BCHE       | butyrylcholinesterase                                                                            |
| C1R        | complement component 1, r subcomponent                                                           |
| C1S        | complement component 1, s subcomponent                                                           |
| C20orf103  | chromosome 20 open reading frame 103                                                             |
| C6orf176   | chromosome 6 open reading frame 176                                                              |
| C7orf16    | chromosome 7 open reading frame 16                                                               |
| CACNA1B    | calcium channel, voltage-dependent, N type, alpha 1B subunit                                     |
| CCL2       | chemokine (C-C motif) ligand 2                                                                   |
| CD24       | CD24 molecule                                                                                    |
| CGNL1      | cingulin-like 1                                                                                  |
| CNN1       | calponin 1, basic, smooth muscle                                                                 |
| COL27A1    | collagen, type XXVII, alpha 1                                                                    |
| CRH        | corticotropin releasing hormone                                                                  |
| CRTAC1     | cartilage acidic protein 1                                                                       |
| CTGF       | connective tissue growth factor                                                                  |
| CXCR7      | chemokine (C-X-C motif) receptor 7                                                               |
| CYP26A1    | cytochrome P450, family 26, subfamily A, polypeptide 1                                           |
| CYR61      | cysteine-rich, angiogenic inducer, 61                                                            |
| DCN        | decorin                                                                                          |
| DDX3Y      | DEAD (Asp-Glu-Ala-Asp) box polypeptide 3, Y-linked                                               |
| DES        | desmin                                                                                           |
| DIRAS3     | DIRAS family, GTP-binding RAS-like 3                                                             |
| DLK1       | delta-like 1 homolog (Drosophila)                                                                |
| DRD1IP     | dopamine receptor D1 interacting protein                                                         |
| ECEL1      | endothelin converting enzyme-like 1                                                              |
| EFEMP1     | EGF-containing fibulin-like extracellular matrix protein 1                                       |
| EGLN3      | egl nine homolog 3 (C. elegans)                                                                  |
| EGR1       | early growth response 1                                                                          |
| EGR2       | early growth response 2 (Krox-20 homolog, Drosophila)                                            |
| EGR4       | early growth response 4                                                                          |
| EMP1       | epithelial membrane protein 1                                                                    |
| FABP6      | fatty acid binding protein 6, ileal (gastrotropin)                                               |
| FAM19A3    | family with sequence similarity 19 (chemokine (C-C motif)-like), member A3                       |
| FAM19A4    | family with sequence similarity 19 (chemokine (C-C motif)-like), member A4                       |
| FBLN1      | fibulin 1                                                                                        |
| FHL2       | four and a half LIM domains 2                                                                    |
| PHOD3      | formin homology 2 domain containing 3                                                            |
| FMOD       | fibromodulin                                                                                     |
| FOS        | v-fos FBJ murine osteosarcoma viral oncogene homolog                                             |
| FOSB       | FBJ murine osteosarcoma viral oncogene homolog B                                                 |
| FSTL5      | folliculin-like 5                                                                                |
| GABRG2     | gamma-aminobutyric acid (GABA) A receptor, gamma 2                                               |
| GAL        | galanin                                                                                          |
| GALNT14    | UDP-N-acetyl-alpha-D-galactosamine:polypeptide N-acetylgalactosaminyltransferase 14 (GalNAc-T14) |
| GCGR       | glucagon receptor                                                                                |
| GDF10      | growth differentiation factor 10                                                                 |
| GLDN       | gliomedin                                                                                        |
| GNG11      | guanine nucleotide binding protein (G protein), gamma 11                                         |
| GNG8       | guanine nucleotide binding protein (G protein), gamma 8                                          |
| GPR30      | G protein-coupled receptor 30                                                                    |
| GRID2      | glutamate receptor, ionotropic, delta 2                                                          |
| GRIK1      | glutamate receptor, ionotropic, kainate 1                                                        |
| H19        | H19, imprinted maternally expressed untranslated mRNA                                            |
| HK2        | hexokinase 2                                                                                     |
| HOXA9      | homeobox A9                                                                                      |
| HOXB5      | homeobox B5                                                                                      |
| HOXB6      | homeobox B6                                                                                      |
| HSD3B2     | hydroxy-delta-5-steroid dehydrogenase, 3 beta- and steroid delta-isomerase 2                     |
| HSPB7      | heat shock 27kDa protein family, member 7 (cardiovascular)                                       |
| IGF2       | insulin-like growth factor 2 (somatomedin A)                                                     |
| IGFBP2     | insulin-like growth factor binding protein 2, 36kDa                                              |
| IGH@       | immunoglobulin heavy locus                                                                       |
| IL13RA2    | interleukin 13 receptor, alpha 2                                                                 |
| INHBB      | inhibin, beta B (activin AB beta polypeptide)                                                    |
| ITGA7      | integrin, alpha 7                                                                                |

|               |                                                                                               |
|---------------|-----------------------------------------------------------------------------------------------|
| JAKMIP1       | janus kinase and microtubule interacting protein 1                                            |
| KBTBD11       | kelch repeat and BTB (POZ) domain containing 11                                               |
| KCNE3         | potassium voltage-gated channel, Isk-related family, member 3                                 |
| KIAA0125      | KIAA0125                                                                                      |
| KIRREL3       | kin of IRRE like 3 (Drosophila)                                                               |
| LAYN          | layilin                                                                                       |
| LOC202134     | hypothetical protein LOC202134                                                                |
| LOC283953     | hypothetical LOC283953                                                                        |
| LOC285878     | hypothetical protein LOC285878                                                                |
| LOC642652     | hypothetical LOC642652                                                                        |
| LOC730130     | hypothetical protein LOC730130                                                                |
| MEG3          | maternally expressed 3                                                                        |
| MOXD1         | monooxygenase, DBH-like 1                                                                     |
| MST150        | MSTP150                                                                                       |
| NEFH          | neurofilament, heavy polypeptide 200kDa                                                       |
| NGB           | neuroglobin                                                                                   |
| NLF2          | nuclear localized factor 2                                                                    |
| NNMT          | nicotinamide N-methyltransferase                                                              |
| NOS2A         | nitric oxide synthase 2A (inducible, hepatocytes)                                             |
| NOV           | nephroblastoma overexpressed gene                                                             |
| NPTX2         | neuronal pentraxin II                                                                         |
| NPY           | neuropeptide Y                                                                                |
| NR4A3         | nuclear receptor subfamily 4, group A, member 3                                               |
| NTNG2         | netrin G2                                                                                     |
| NXPH1         | neurexophilin 1                                                                               |
| NY-REN-7      | NY-REN-7 antigen                                                                              |
| OSAP          | ovary-specific acidic protein                                                                 |
| PCDH11Y       | protocadherin 11 Y-linked                                                                     |
| PCP4          | Purkinje cell protein 4                                                                       |
| PCSK1         | proprotein convertase subtilisin/kexin type 1                                                 |
| PCSK2         | proprotein convertase subtilisin/kexin type 2                                                 |
| PDZK1         | PDZ domain containing 1                                                                       |
| PENK          | proenkephalin                                                                                 |
| PNMT          | phenylethanolamine N-methyltransferase                                                        |
| PON3          | paraoxonase 3                                                                                 |
| PROK2         | prokineticin 2                                                                                |
| PTN           | pleiotrophin (heparin binding growth factor 8, neurite growth-promoting factor 1)             |
| RAB34         | RAB34, member RAS oncogene family                                                             |
| RARRES2       | retinoic acid receptor responder (tazarotene induced) 2                                       |
| RASGEF1A      | RasGEF domain family, member 1A                                                               |
| RET           | ret proto-oncogene                                                                            |
| RFXDC1        | regulatory factor X domain containing 1                                                       |
| RGN           | regucalcin (senescence marker protein-30)                                                     |
| RP13-102H20.1 | hypothetical protein FLJ30058                                                                 |
| RPS4Y1        | ribosomal protein S4, Y-linked 1                                                              |
| RPS4Y2        | ribosomal protein S4, Y-linked 2                                                              |
| RSPO1         | R-spondin homolog (Xenopus laevis)                                                            |
| SALL4         | sal-like 4 (Drosophila)                                                                       |
| SAMD5         | sterile alpha motif domain containing 5                                                       |
| SCGN          | secretagogin, EF-hand calcium binding protein                                                 |
| SFRP1         | secreted frizzled-related protein 1                                                           |
| SHC3          | SHC (Src homology 2 domain containing) transforming protein 3                                 |
| SHD           | Src homology 2 domain containing transforming protein D                                       |
| SLC16A12      | solute carrier family 16, member 12 (monocarboxylic acid transporter 12)                      |
| SLC32A1       | solute carrier family 32 (GABA vesicular transporter), member 1                               |
| SLC35F3       | solute carrier family 35, member F3                                                           |
| SLC6A2        | solute carrier family 6 (neurotransmitter transporter, noradrenalin), member 2                |
| SLITRK6       | SLIT and NTRK-like family, member 6                                                           |
| SMOC1         | SPARC related modular calcium binding 1                                                       |
| SORCS3        | sortilin-related VPS10 domain containing receptor 3                                           |
| SORL1         | sortilin-related receptor, L(DLR class) A repeats-containing                                  |
| SPON1         | spondin 1, extracellular matrix protein                                                       |
| SPP1          | secreted phosphoprotein 1 (osteopontin, bone sialoprotein I, early T-lymphocyte activation 1) |
| SST           | somatostatin                                                                                  |
| STAR          | steroidogenic acute regulatory protein                                                        |
| STRA6         | stimulated by retinoic acid gene 6 homolog (mouse)                                            |
| SV2B          | synaptic vesicle glycoprotein 2B                                                              |
| SV2C          | synaptic vesicle glycoprotein 2C                                                              |
| SYNPR         | synaptoporin                                                                                  |
| SYT13         | synaptotagmin XIII                                                                            |
| TAC3          | tachykinin 3 (neuromedin K, neurokinin beta)                                                  |
| TFPI2         | tissue factor pathway inhibitor 2                                                             |
| THBS2         | thrombospondin 2                                                                              |
| TM4SF4        | transmembrane 4 L six family member 4                                                         |
| XIST          | X (inactive)-specific transcript                                                              |
| ZFP36         | zinc finger protein 36, C3H type, homolog (mouse)                                             |

The 153 genes with highest variance in 26 tumors samples, discriminating two expression clusters of PPGL tumors.
