# Supplementary material for: MYO5B mutations in pheochromocytoma/paraganglioma promote cancer progression
Source: PubMed Central journal article supplement (PMC7329139; doi:10.1371/journal.pgen.1008803), 2020-06-08
Supplement: pgen.1008803.s007.pdf [file pgen.1008803.s007.pdf]

**S4 Table. MYO5B microarray mRNA expression of three MYO5B mutants versus empty vector**

| Comparison        | File name         | logFC       | FC          | AveExpr    | t          | P.Value    | adj.p      | Gene symbo | Gene name |
|-------------------|-------------------|-------------|-------------|------------|------------|------------|------------|------------|-----------|
| MUT1vsEV_24_group | TC1800009290.hg.1 | 1,636725607 | 3,109592659 | 7,0390488  | 14,5019261 | 1,80E-05   | 0,01119896 | MYO5B      | myosin VB |
| MUT1vsEV_48_group | TC1800009290.hg.1 | 1,053797988 | 2,075987833 | 6,36332475 | 1,86322822 | 0,1116624  | 0,72152826 | MYO5B      | myosin VB |
| MUT1vsEV_72_group | TC1800009290.hg.1 | 1,451081137 | 2,734128666 | 6,58910504 | 4,07387388 | 0,00832155 | 0,2725483  | MYO5B      | myosin VB |
| MUT2vsEV_24_group | TC1800009290.hg.1 | 1,38612645  | 2,613759589 | 6,91374922 | 14,0882487 | 1,52E-05   | 0,00785222 | MYO5B      | myosin VB |
| MUT2vsEV_48_group | TC1800009290.hg.1 | 2,138077606 | 4,401751212 | 6,90546456 | 8,19714745 | 0,00031448 | 0,32386982 | MYO5B      | myosin VB |
| MUT2vsEV_72_group | TC1800009290.hg.1 | 2,220118587 | 4,659317317 | 6,97362377 | 4,60738119 | 0,00527745 | 0,36221581 | MYO5B      | myosin VB |
| MUT3vsEV_24_group | TC1800009290.hg.1 | 0,635143379 | 1,553092093 | 6,53825769 | 6,45286685 | 0,00103022 | 0,0729943  | MYO5B      | myosin VB |
| MUT3vsEV_48_group | TC1800009290.hg.1 | 0,561094104 | 1,47538769  | 6,11697281 | 2,05107356 | 0,08514124 | 0,87948601 | MYO5B      | myosin VB |
| MUT3vsEV_72_group | TC1800009290.hg.1 | 0,890159551 | 1,853381082 | 6,30864425 | 2,88890243 | 0,03300276 | 0,39488784 | MYO5B      | myosin VB |
| WTvsEV_24_group   | TC1800009290.hg.1 | 0,771781039 | 1,707376277 | 6,60657652 | 4,73264477 | 0,00157534 | 0,12696861 | MYO5B      | myosin VB |
| WTvsEV_48_group   | TC1800009290.hg.1 | 0,70779808  | 1,633309368 | 6,1903248  | 5,55612038 | 0,00173524 | 0,24266756 | MYO5B      | myosin VB |
| WTvsEV_72_group   | TC1800009290.hg.1 | 0,878400227 | 1,83833568  | 6,30276459 | 3,79944637 | 0,00927524 | 0,27147469 | MYO5B      | myosin VB |

Microarray expression analysis of SK-N-AS constructs; MUT 1(p.L587P), MUT 2 (p.G1611S), and MUT 3 (p.R1641C) and wild type (WT) MYO5B compared to empty vector (EV). Calculations are based on measures from two SK-N-AS passages (p23 and p30) for each mutation and time point of proliferation (24h, 48h and 72h). t-statistic (t), significance (P.Value, and adj.p) and fold change (FC) from MUTvsEV group comparison.
