# Supplementary material for: MYO5B mutations in pheochromocytoma/paraganglioma promote cancer progression
Source: PubMed Central journal article supplement (PMC7329139; doi:10.1371/journal.pgen.1008803), 2020-06-08
Supplement: pgen.1008803.s009.pdf [file pgen.1008803.s009.pdf]

**S6 Table. Gene ontology enrichment analysis on top differentially expressed genes**

| GO Term    | Description                                                                  | P-value | Enrichment | N     | B    | n  | b  | Genes                                                                                              |
|------------|------------------------------------------------------------------------------|---------|------------|-------|------|----|----|----------------------------------------------------------------------------------------------------|
| GO:0030335 | positive regulation of cell migration                                        | 7.62E-6 | 7.61       | 17280 | 478  | 38 | 8  | ATP8A1, LPAR1, FN1, SEMA3A, FLT1, CEMIP, ROR2, POSTN                                               |
| GO:2000147 | positive regulation of cell motility                                         | 1.09E-5 | 7.25       | 17280 | 502  | 38 | 8  | ATP8A1, LPAR1, FN1, SEMA3A, FLT1, CEMIP, ROR2, POSTN                                               |
| GO:0051272 | positive regulation of cellular component movement                           | 1.33E-5 | 7.05       | 17280 | 516  | 38 | 8  | ATP8A1, LPAR1, FN1, SEMA3A, FLT1, CEMIP, ROR2, POSTN                                               |
| GO:0040017 | positive regulation of locomotion                                            | 1.59E-5 | 6.88       | 17280 | 529  | 38 | 8  | ATP8A1, LPAR1, FN1, SEMA3A, FLT1, CEMIP, ROR2, POSTN                                               |
| GO:0030334 | regulation of cell migration                                                 | 4.49E-5 | 5.12       | 17280 | 799  | 38 | 9  | LPAR1, ATP8A1, FN1, IL24, SEMA3A, FLT1, CEMIP, ROR2, POSTN                                         |
| GO:1900020 | positive regulation of protein kinase C activity                             | 4.69E-5 | 181.89     | 17280 | 5    | 38 | 2  | CEMIP, ROR2                                                                                        |
| GO:1900019 | regulation of protein kinase C activity                                      | 4.69E-5 | 181.89     | 17280 | 5    | 38 | 2  | CEMIP, ROR2                                                                                        |
| GO:0021889 | olfactory bulb interneuron differentiation                                   | 4.69E-5 | 181.89     | 17280 | 5    | 38 | 2  | SALL1, DLX5                                                                                        |
| GO:1901166 | neural crest cell migration involved in autonomic nervous system development | 7.02E-5 | 151.58     | 17280 | 6    | 38 | 2  | FN1, SEMA3A                                                                                        |
| GO:0021675 | nerve development                                                            | 7.85E-5 | 35.90      | 17280 | 38   | 38 | 3  | SALL1, LPAR1, SEMA3A                                                                               |
| GO:2000145 | regulation of cell motility                                                  | 7.87E-5 | 4.76       | 17280 | 859  | 38 | 9  | LPAR1, ATP8A1, FN1, IL24, SEMA3A, FLT1, CEMIP, ROR2, POSTN                                         |
| GO:0040012 | regulation of locomotion                                                     | 1.38E-4 | 4.43       | 17280 | 924  | 38 | 9  | LPAR1, ATP8A1, FN1, IL24, SEMA3A, FLT1, CEMIP, ROR2, POSTN                                         |
| GO:0051270 | regulation of cellular component movement                                    | 1.46E-4 | 4.40       | 17280 | 931  | 38 | 9  | LPAR1, ATP8A1, FN1, IL24, SEMA3A, FLT1, CEMIP, ROR2, POSTN                                         |
| GO:0021782 | glial cell development                                                       | 1.58E-4 | 28.42      | 17280 | 48   | 38 | 3  | PHGDH, LPAR1, ROR2                                                                                 |
| GO:0032879 | regulation of localization                                                   | 2.21E-4 | 2.62       | 17280 | 2604 | 38 | 15 | FN1, SEMA3A, CEMIP, FLT1, ROR2, LYPD1, ATP8A1, LPAR1, IL24, PLCL1, RIMS2, GCG, CORIN, POSTN, SCN8A |
| GO:0021879 | forebrain neuron differentiation                                             | 4.21E-4 | 64.96      | 17280 | 14   | 38 | 2  | SALL1, DLX5                                                                                        |
| GO:0030198 | extracellular matrix organization                                            | 5.89E-4 | 7.24       | 17280 | 314  | 38 | 5  | ADAMTS4, ITGA10, FN1, COL4A1, POSTN                                                                |
| GO:0048588 | developmental cell growth                                                    | 7.17E-4 | 17.05      | 17280 | 80   | 38 | 3  | SORBS2, SEMA3A, POSTN                                                                              |
| GO:0016049 | cell growth                                                                  | 7.71E-4 | 16.64      | 17280 | 82   | 38 | 3  | SORBS2, SEMA3A, POSTN                                                                              |
| GO:0051962 | positive regulation of nervous system development                            | 8.02E-4 | 5.34       | 17280 | 511  | 38 | 6  | LPAR1, FN1, SEMA3A, RIMS2, LRRN3, ROR2                                                             |

The top-ranked differentially expressed genes (see S5 Table) from all three MYO5B mutants were analyzed using GOrilla (Gene Ontology enRiChment anaLysis and visualiZAtion tool, <http://cbl-gorilla.cs.technion.ac.il>) with all genes present on the microarray used as background. N=total no. of genes recognized by Gorilla and associated with GO terms, B=no. of genes associated with the specified GO term, n=no. of genes recognized by GOrilla in the target set (one gene annotation including several genes and one gene not associated with any GO terms were excluded), b=no. of genes in the target set associated with the specified GO term. P-value threshold < 10<sup>-3</sup>.
