# Supplementary material for: MYO5B mutations in pheochromocytoma/paraganglioma promote cancer progression
Source: PubMed Central journal article supplement (PMC7329139; doi:10.1371/journal.pgen.1008803), 2020-06-08
Supplement: pgen.1008803.s010.pdf [file pgen.1008803.s010.pdf]

**S7 Table. Gene set enrichment analysis (GSEA) of ranked gene lists**

| <b>UP</b>                            |             |          |                 |                 |                     |                 |                     |            |              |      |
|--------------------------------------|-------------|----------|-----------------|-----------------|---------------------|-----------------|---------------------|------------|--------------|------|
| Name                                 | Genes (tot) | Mutation | Stat (dist.dir) | p (dist.dir.up) | p adj (dist.dir.up) | p (dist.dir.dn) | p adj (dist.dir.dn) | Genes (up) | Genes (down) | Rank |
| HALLMARK_MYC_TARGETS_V1              | 200         | MUT2     | 0,38295         | 0,0009058       | 0,16153             | NA              | NA                  | 138        | 62           | 4    |
|                                      |             | MUT1     | 0,43856         | 0,00021436      | 0,056484            | NA              | NA                  | 147        | 53           | 10   |
| KEGG_BASE_EXCISION_REPAIR            | 33          | MUT1     | 0,65146         | 0,0014236       | 0,025126            | NA              | NA                  | 28         | 5            | 6    |
|                                      |             | MUT2     | 0,50365         | 0,039056        | 0,18487             | NA              | NA                  | 23         | 10           | 9    |
| KEGG_BASAL_TRANSCRIPTION_FACTORS     | 35          | MUT2     | 0,58108         | 0,0052214       | 0,14737             | NA              | NA                  | 28         | 7            | 1    |
|                                      |             | MUT3     | 0,32971         | 0,35469         | 0,95288             | NA              | NA                  | 26         | 9            | 15   |
| HALLMARK_E2F_TARGETS                 | 200         | MUT1     | 0,57294         | 0,00021436      | 0                   | NA              | NA                  | 170        | 30           | 1    |
|                                      |             | MUT3     | 0,22234         | 0,5425          | 0,96653             | NA              | NA                  | 115        | 85           | 16   |
| KEGG_RENIN_ANGIOTENSIN_SYSTEM        | 17          | MUT1     | 0,73524         | 0,0022481       | 0,018168            | NA              | NA                  | 11         | 6            | 2    |
|                                      |             | MUT3     | 0,28159         | 0,77244         | 0,98051             | NA              | NA                  | 7          | 10           | 19   |
| KEGG_TERPENOID_BACKBONE_BIOSYNTHESIS | 15          | MUT1     | 0,70412         | 0,013427        | 0,052002            | NA              | NA                  | 12         | 3            | 8    |
|                                      |             | MUT2     | 0,64099         | 0,033571        | 0,19602             | NA              | NA                  | 13         | 2            | 13   |
| KEGG_GLYCOSAMINOGLYCAN_DEGRADATION   | 21          | MUT3     | 0,37234         | 0,37081         | 0,90174             | NA              | NA                  | 9          | 12           | 6    |
|                                      |             | MUT1     | 0,55521         | 0,064542        | 0,18881             | NA              | NA                  | 10         | 11           | 18   |
| KEGG_DRUG_METABOLISM_OTHER_ENZYMES   | 51          | MUT3     | 0,27357         | 0,53683         | 0,97784             | NA              | NA                  | 27         | 24           | 18   |
|                                      |             | MUT1     | 0,46417         | 0,03798         | 0,19044             | NA              | NA                  | 28         | 23           | 19   |

  

| <b>DOWN</b>                                               |             |          |                 |                 |                     |                 |                     |            |              |      |
|-----------------------------------------------------------|-------------|----------|-----------------|-----------------|---------------------|-----------------|---------------------|------------|--------------|------|
| Name                                                      | Genes (tot) | Mutation | Stat (dist.dir) | p (dist.dir.up) | p adj (dist.dir.up) | p (dist.dir.dn) | p adj (dist.dir.dn) | Genes (up) | Genes (down) | Rank |
| HALLMARK_TNFA_SIGNALING_VIA_NFKB                          | 200         | MUT1     | -0,57065        | NA              | NA                  | 0,00018737      | 0                   | 69         | 131          | 1    |
|                                                           |             | MUT3     | -0,58875        | NA              | NA                  | 0,00014908      | 0                   | 59         | 141          | 1    |
| HALLMARK_INFLAMMATORY_RESPONSE                            | 199         | MUT1     | -0,47456        | NA              | NA                  | 0,0001912       | 0,02152             | 82         | 117          | 3    |
|                                                           |             | MUT3     | -0,46823        | NA              | NA                  | 0,00015113      | 0,029599            | 74         | 125          | 6    |
| KEGG_ECM_RECEPTOR_INTERACTION                             | 84          | MUT3     | -0,54652        | NA              | NA                  | 0,00049172      | 0,015786            | 30         | 54           | 3    |
|                                                           |             | MUT1     | -0,54317        | NA              | NA                  | 0,00019478      | 0,034618            | 30         | 54           | 7    |
| KEGG_ARRHYTHMOGENIC_RIGHT_VENTRICULAR_CARDIOMYOPATHY_ARVC | 74          | MUT1     | -0,55136        | NA              | NA                  | 0,00038647      | 0,024958            | 29         | 45           | 5    |
|                                                           |             | MUT3     | -0,5188         | NA              | NA                  | 0,00099536      | 0,040185            | 29         | 45           | 8    |
| HALLMARK_COAGULATION                                      | 138         | MUT3     | -0,48868        | NA              | NA                  | 0,00015903      | 0,024082            | 66         | 72           | 4    |
|                                                           |             | MUT1     | -0,44516        | NA              | NA                  | 0,00096376      | 0,094573            | 53         | 85           | 11   |
| HALLMARK_EPITHELIAL_MESENCHYMAL_TRANSITION                | 200         | MUT3     | -0,49226        | NA              | NA                  | 0,00014908      | 0,013229            | 93         | 107          | 2    |
|                                                           |             | MUT1     | -0,41111        | NA              | NA                  | 0,0013116       | 0,11322             | 91         | 109          | 14   |
| HALLMARK_KRAS_SIGNALING_UP                                | 199         | MUT1     | -0,47205        | NA              | NA                  | 0,0001912       | 0,021304            | 80         | 119          | 2    |
|                                                           |             | MUT3     | -0,42483        | NA              | NA                  | 0,00015113      | 0,061088            | 89         | 110          | 14   |
| KEGG_HYPERTROPHIC_CARDIOMYOPATHY_HCM                      | 83          | MUT1     | -0,54171        | NA              | NA                  | 0,00019268      | 0,029393            | 39         | 44           | 6    |
| KEGG_HYPERTROPHIC_CARDIOMYOPATHY_HCM                      | 83          | MUT3     | -0,49004        | NA              | NA                  | 0,0018531       | 0,04927             | 34         | 49           | 11   |
| KEGG_SMALL_CELL_LUNG_CANCER                               | 84          | MUT3     | -0,52473        | NA              | NA                  | 0,00065563      | 0,025757            | 34         | 50           | 5    |
|                                                           |             | MUT1     | -0,47299        | NA              | NA                  | 0,0054538       | 0,11151             | 42         | 42           | 13   |
| KEGG_DILATED_CARDIOMYOPATHY                               | 90          | MUT1     | -0,54353        | NA              | NA                  | 0,00019264      | 0,038623            | 41         | 49           | 8    |
|                                                           |             | MUT3     | -0,4458         | NA              | NA                  | 0,0062418       | 0,081967            | 43         | 47           | 18   |
| KEGG_COMPLEMENT_AND_COAGULATION_CASCADES                  | 69          | MUT3     | -0,49684        | NA              | NA                  | 0,0041722       | 0,058933            | 28         | 41           | 13   |
|                                                           |             | MUT1     | -0,4852         | NA              | NA                  | 0,0080568       | 0,11629             | 23         | 46           | 15   |
| HALLMARK_COMPLEMENT                                       | 200         | MUT3     | -0,43853        | NA              | NA                  | 0,00014908      | 0,045257            | 75         | 125          | 10   |
|                                                           |             | MUT1     | -0,3914         | NA              | NA                  | 0,0026232       | 0,18165             | 89         | 111          | 19   |
| KEGG_PATHWAYS_IN_CANCER                                   | 325         | MUT1     | -0,39152        | NA              | NA                  | 0,00037147      | 0,10864             | 154        | 171          | 12   |
|                                                           |             | MUT3     | -0,39123        | NA              | NA                  | 0,00014337      | 0,080099            | 144        | 181          | 17   |

Gene Set Enrichment Analysis (GSEA) performed on expression gene lists (ranked after mean fold change) for each mutant; MUT1 (p.L587P), MUT2 (p.G1611S), and MUT3 (p.R1641C), using 236 gene sets (50 H Hallmark, and 186 C2: KEGG curated gene sets) from the Molecular Signature database (<http://software.broadinstitute.org/gsea/msigdb/index.jsp>). The overlapping gene sets among the 20 top-ranked with up-regulated genes (UP) and 20 top-ranked with down-regulated genes (DOWN) for each mutations are listed.
