# Supplementary material for: MYO5B mutations in pheochromocytoma/paraganglioma promote cancer progression
Source: PubMed Central journal article supplement (PMC7329139; doi:10.1371/journal.pgen.1008803), 2020-06-08
Supplement: pgen.1008803.s011.pdf [file pgen.1008803.s011.pdf]

**S8 Table. TaqMan Array Micro Fluidic Cards design**

| Assay ID      | Availability | Gene Symbol(s) | Gene Name(s)                                              | Gene Alias(es)                                                                                                                                                                                                                                                                                                                                                                                                                                                                                                                                                                                                                                                                                                                                    | RefSeq(s)                                                                                                                                                                                                                                                                                                                                                         | GenBank mRNA(s)                                                                                                                                                                                                                             | Amplicon Length (bp) |
|---------------|--------------|----------------|-----------------------------------------------------------|---------------------------------------------------------------------------------------------------------------------------------------------------------------------------------------------------------------------------------------------------------------------------------------------------------------------------------------------------------------------------------------------------------------------------------------------------------------------------------------------------------------------------------------------------------------------------------------------------------------------------------------------------------------------------------------------------------------------------------------------------|-------------------------------------------------------------------------------------------------------------------------------------------------------------------------------------------------------------------------------------------------------------------------------------------------------------------------------------------------------------------|---------------------------------------------------------------------------------------------------------------------------------------------------------------------------------------------------------------------------------------------|----------------------|
| Hs00261625_s1 | INV          | INSM2          | INSM transcriptional repressor 2                          | IA-6;IA6;mlt1                                                                                                                                                                                                                                                                                                                                                                                                                                                                                                                                                                                                                                                                                                                                     | NM_032594.3                                                                                                                                                                                                                                                                                                                                                       | AB037912.1;AK096639.1;BC130377.1;X403968.1;AF260323.1;BC130379.1                                                                                                                                                                            | 98                   |
| Hs00287613_m1 | INV          | GALNT13        | polypeptide N-acetylgalactosaminyltransferase 13          | GalNAc-T13                                                                                                                                                                                                                                                                                                                                                                                                                                                                                                                                                                                                                                                                                                                                        | XM_017003261.1;XM_017003260.1;XM_011510538.2;XM_017003263.1;XM_017003262.1;XM_017003259.1;XM_017003258.1;NM_001301627.1;NM_052917.3;XM_011510537.2                                                                                                                                                                                                                | AJ505991.2;BC101034.2;BC101031.1;AB067505.1;AB078142.1;KJ535058.1;AK131195.1;BC101033.1;BC101032.2;AK308675.1;KJ534843.1                                                                                                                    | 62                   |
| Hs01075227_m1 | INV          | UCP2           | uncoupling protein 2                                      | BMIQ4;SLC25A8;UCPH                                                                                                                                                                                                                                                                                                                                                                                                                                                                                                                                                                                                                                                                                                                                | NM_003355.2                                                                                                                                                                                                                                                                                                                                                       | AK025742.1;AK222540.1;AK222557.1;U94592.1;U82819.1;BC011737.2                                                                                                                                                                               | 62                   |
| Hs99999905_m1 | INV          | GAPDH          | glyceraldehyde-3-phosphate dehydrogenase                  | G3PD, GAPD, HEL-S-162eP                                                                                                                                                                                                                                                                                                                                                                                                                                                                                                                                                                                                                                                                                                                           | NM_001289746.1;NM_002046.5                                                                                                                                                                                                                                                                                                                                        | AB062273.1;AF261085.1;AK026525.1;AK299448.1;AK308198.1;AY007133.1;BC001601.1;BC004109.2;BC009081.1;BC013310.2;BC020308.1;BC025925.1;BC026907.1;BC029340.1;BC029618.1;BC083511.1;BU155402.1;EU668321.1;HY022295.1;M17851.1;M33197.1;X53778.1 | 122                  |
| Hs00198141_m1 | INV          | CORIN          | corin, serine peptidase                                   | ATC2;CRN;Lrp4;PEE5;TMPRSS10                                                                                                                                                                                                                                                                                                                                                                                                                                                                                                                                                                                                                                                                                                                       | NM_001278586.1;NM_001278585.1;NM_006587.3                                                                                                                                                                                                                                                                                                                         | BC110451.2;AK302816.1;AK304038.1;AF133845.1;AK304466.1;AK297675.1                                                                                                                                                                           | 102                  |
| Hs00604157_m1 | INV          | FRMD3          | FERM domain containing 3                                  | 4.10;EPB41L40;EPB41LO;P410                                                                                                                                                                                                                                                                                                                                                                                                                                                                                                                                                                                                                                                                                                                        | XM_017014588.1;NM_174938.5;XM_017014589.1;XM_017014590.1;NM_001244960.1;NM_001244959.1;NM_001244961.1                                                                                                                                                                                                                                                             | BC037253.1;AK223597.1;EF560742.1;AK297722.1;AK094281.1;AY137774.1                                                                                                                                                                           | 80                   |
| Hs01932946_s1 | INV          | ARMCX2         | armadillo repeat containing, X-linked 2                   | ALEX2;GASP9                                                                                                                                                                                                                                                                                                                                                                                                                                                                                                                                                                                                                                                                                                                                       | XM_017029988.1;XM_017029989.1;XM_017029987.1;XM_005278117.1;XM_017029992.1;XM_005278116.1;XM_017029990.1;XM_017029991.1;NM_001282231.1;XM_017029994.1;NM_014782.6;XM_011531071.1;NM_177949.3;XM_011531072.1;XM_017029993.1;XM_005278113.1;XM_017029997.1;XM_005278115.1;XM_017029995.1;XM_005278114.1;XM_017029996.1;XM_005278109.1;XM_005278111.1;XM_005278110.1 | AB011084.1;AK291342.1;BX648494.1;BC012541.1;BC015926.1                                                                                                                                                                                      | 148                  |
| Hs00196518_m1 | INV          | PLCL1          | phospholipase C like 1                                    | PLCE;PLCL;PLDL1;PPP1R127;PRIP                                                                                                                                                                                                                                                                                                                                                                                                                                                                                                                                                                                                                                                                                                                     | XM_005246643.3;XM_017004339.1;NM_006226.3;XM_017004340.1;XM_011511351.2;XM_005246644.3                                                                                                                                                                                                                                                                            | BX537442.1;AK127514.1;D42108.1;BC101531.1;BC111985.1;AK302673.1                                                                                                                                                                             | 65                   |
| Hs01031536_m1 | INV          | GCG            | glucagon                                                  | GLP1;GLP2;GRPP                                                                                                                                                                                                                                                                                                                                                                                                                                                                                                                                                                                                                                                                                                                                    | NM_002054.4                                                                                                                                                                                                                                                                                                                                                       | BC005278.1;BM272442.1;J04040.1;BT006813.1                                                                                                                                                                                                   | 86                   |
| Hs04384957_m1 | INV          | FILIP1L        | filamin A interacting protein 1 like                      | DOC-1;DOC1;GIP130;GIP90                                                                                                                                                                                                                                                                                                                                                                                                                                                                                                                                                                                                                                                                                                                           | NM_001042459.2;NM_182909.3                                                                                                                                                                                                                                                                                                                                        | AX776298.1;AF514867.1;AF514868.1;AF514869.1;BC020941.1;BC017987.1;AY642382.1;AF329092.1;AX776292.1;AX776296.1;AX776294.1                                                                                                                    | 84                   |
| Hs00192708_m1 | INV          | ADAMTS4        | ADAM metalloproteinase with thrombospondin type 1 motif 4 | ADAMTS-2;ADAMTS-4;ADMP-1                                                                                                                                                                                                                                                                                                                                                                                                                                                                                                                                                                                                                                                                                                                          | NM_005099.5;NM_001320336.1                                                                                                                                                                                                                                                                                                                                        | AB014588.1;AY358886.1;AF148213.1;BC063293.1;AK291573.1                                                                                                                                                                                      | 63                   |
| Hs00173810_m1 | INV          | SEMA3A         | semaphorin 3A                                             | COLL1;HHH16;Hsema-I;Hsema-III;SEMA1;SEMA2;SEMA3;SEMA4;SEMA5;SEMA6;SEMA7;SEMA8;SEMA9;SEMA10;SEMA11;SEMA12;SEMA13;SEMA14;SEMA15;SEMA16;SEMA17;SEMA18;SEMA19;SEMA20;SEMA21;SEMA22;SEMA23;SEMA24;SEMA25;SEMA26;SEMA27;SEMA28;SEMA29;SEMA30;SEMA31;SEMA32;SEMA33;SEMA34;SEMA35;SEMA36;SEMA37;SEMA38;SEMA39;SEMA40;SEMA41;SEMA42;SEMA43;SEMA44;SEMA45;SEMA46;SEMA47;SEMA48;SEMA49;SEMA50;SEMA51;SEMA52;SEMA53;SEMA54;SEMA55;SEMA56;SEMA57;SEMA58;SEMA59;SEMA60;SEMA61;SEMA62;SEMA63;SEMA64;SEMA65;SEMA66;SEMA67;SEMA68;SEMA69;SEMA70;SEMA71;SEMA72;SEMA73;SEMA74;SEMA75;SEMA76;SEMA77;SEMA78;SEMA79;SEMA80;SEMA81;SEMA82;SEMA83;SEMA84;SEMA85;SEMA86;SEMA87;SEMA88;SEMA89;SEMA90;SEMA91;SEMA92;SEMA93;SEMA94;SEMA95;SEMA96;SEMA97;SEMA98;SEMA99;SEMA100 | XM_006715839.3;NM_006080.2;XM_005250110.3;XM_011515734.2;XM_017011673.1;XM_005250111.4                                                                                                                                                                                                                                                                            | BC111416.1;J26081.1;AK289954.1                                                                                                                                                                                                              | 80                   |
| Hs01052961_m1 | INV          | FLT1           | fms related tyrosine kinase 1                             | FLT;FLT-1;VEGFR-1;VEGFR1                                                                                                                                                                                                                                                                                                                                                                                                                                                                                                                                                                                                                                                                                                                          | XM_011535014.1;NM_001160031.1;NM_001160030.1;NM_001159920.1;XM_017020485.1;NM_002019.4                                                                                                                                                                                                                                                                            | AK292936.1;AF063657.2;EU368830.1;AK300392.1;EU360600.1;U01134.1;AK309901.1;EU826561.1;BC039007.1                                                                                                                                            | 72                   |
| Hs01552114_m1 | INV          | CEMIP          | cell migration inducing hyaluronan binding protein        | CCSP1;HYBID;KIAA1199;TMEM2L                                                                                                                                                                                                                                                                                                                                                                                                                                                                                                                                                                                                                                                                                                                       | NM_001293298.1;NM_001293304.1;NM_018689.2                                                                                                                                                                                                                                                                                                                         | AB103330.1;AY581148.1;AY585237.1;AY581149.1;AY007811.1;BC020256.1;AL359061.1;AB033025.1;AK026540.1                                                                                                                                          | 61                   |
| Hs00266237_m1 | INV          | COL4A1         | collagen type IV alpha 1 chain                            | BSVD;RATOR                                                                                                                                                                                                                                                                                                                                                                                                                                                                                                                                                                                                                                                                                                                                        | NM_001845.5;XM_011521048.2;NM_00130310.1                                                                                                                                                                                                                                                                                                                          | X05561.1;BC151220.1;AB209646.1;Y00706.1;BC142626.1                                                                                                                                                                                          | 75                   |
| Hs00266026_m1 | INV          | IGFBP7         | insulin like growth factor binding protein 7              | AGM;FSTL2;IBP-7;IGFBP-7;IGFBP-7v;IGFBPRP1;MAC25;PSF;RAMSVPS;TAF                                                                                                                                                                                                                                                                                                                                                                                                                                                                                                                                                                                                                                                                                   | NM_001553.2;NM_001253835.1                                                                                                                                                                                                                                                                                                                                        | AF540057.1;L19182.1;S75725.1;BC066339.1;BT006654.1;AK316082.1;AK303915.1;BC017201.2                                                                                                                                                         | 86                   |

|               |     |          |                                                 |                                                               |                                                                                                                                                                                                                                                                                                                                                                                                                                                                                                                                                                                                                                                                                                                |                                                                                                                                                           |     |
|---------------|-----|----------|-------------------------------------------------|---------------------------------------------------------------|----------------------------------------------------------------------------------------------------------------------------------------------------------------------------------------------------------------------------------------------------------------------------------------------------------------------------------------------------------------------------------------------------------------------------------------------------------------------------------------------------------------------------------------------------------------------------------------------------------------------------------------------------------------------------------------------------------------|-----------------------------------------------------------------------------------------------------------------------------------------------------------|-----|
| Hs01573641_mH | MTO | DLX5     | distal-less homeobox 5                          | SHFMID                                                        | XM_017011803.1;NM_005221.5;XM_005250185.3                                                                                                                                                                                                                                                                                                                                                                                                                                                                                                                                                                                                                                                                      | AK023493.1;BC006226.2;BT006903.1                                                                                                                          | 116 |
| Hs00904660_m1 | INV | EMB      | embigin                                         | GP70                                                          | XM_011543146.2;NM_198449.2                                                                                                                                                                                                                                                                                                                                                                                                                                                                                                                                                                                                                                                                                     | DC309453.1;BC059398.1;AK300860.1;AK304226.1                                                                                                               | 150 |
| Hs01566750_m1 | INV | POSTN    | periostin                                       | OSF-2;OSF2;PDLPOSTN;PN                                        | XM_017020356.1;NM_001135936.1;NM_001286667.1;NM_001135935.1;XM_017020355.1;NM_006475.2;NM_001135934.1;XM_005266231.2;NM_001286666.1;NM_001286665.1;XM_005266232.2                                                                                                                                                                                                                                                                                                                                                                                                                                                                                                                                              | AY140646.1;BC106709.1;EU262886.1;AK30026.1;EU262884.1;EU262885.1;BC106710.1;BY795054.2;AY918092.1;GU354210.1;D13665.1;EU262883.1;D13666.1                 | 67  |
| Hs01106329_m1 | INV | PHGDH    | phosphoglycerate dehydrogenase                  | 3-PGDH;3PGDH;HEL-S-113;NLS;NLS1;PDG;PGAD;PGD;PGDH;PHGDHD;SERA | XM_011541228.1;XM_011541227.2;XM_011541226.1;XM_011541231.2;NM_006623.3                                                                                                                                                                                                                                                                                                                                                                                                                                                                                                                                                                                                                                        | FJ224347.1;AK309662.1;AK315360.1;BC023235.1;CR456795.1;AK129762.1;AK093306.1;BC032110.2;AF171237.1;AF171236.1;BC011262.1;BC001349.2;AF171235.1;BC003030.2 | 58  |
| Hs01102345_m1 | INV | RPL37A   | ribosomal protein L37a                          | L37A                                                          | NM_000998.4                                                                                                                                                                                                                                                                                                                                                                                                                                                                                                                                                                                                                                                                                                    | L22154.1;L06499.1;CD249666.1;X66699.1;BC067789.1;BC082239.1;AK289472.1;BC000555.2;BC014262.2;BC016748.2                                                   | 125 |
| Hs00427620_m1 | INV | TBP      | TATA-box binding protein                        | GTF2D;GTF2D1;HDL4;SCA17;TFIID                                 | NM_001172085.1;NM_003194.4                                                                                                                                                                                                                                                                                                                                                                                                                                                                                                                                                                                                                                                                                     | BC109054.1;CR456776.1;Z22828.1;X54993.1;AK315222.1;BT019657.1;BC109053.1;BC110341.1;M34960.1;AK304648.1;M55654.1                                          | 91  |
| Hs01597483_m1 | INV | ATP8A1   | ATPase phospholipid transporting 8A1            | ATPASEII;ATPIA;ATPP2                                          | XM_011513618.1;XM_011513615.1;XM_017007646.1;NM_006095.2;XM_005248043.2;XM_017007645.1;XM_011513616.2;XM_017007647.1;NM_001105529.1                                                                                                                                                                                                                                                                                                                                                                                                                                                                                                                                                                            | AB209687.1;AF067820.1;AB013452.1;BC020943.1;BP232466.1;BC109317.1;BC109318.1                                                                              | 77  |
| Hs00896176_m1 | INV | ROR2     | receptor tyrosine kinase like orphan receptor 2 | BDB;BDB1;NTRKR2                                               | XM_005252008.4;XM_017014762.1;XM_006717121.3;XM_017014763.1;NM_004560.3;XM_005252009.3                                                                                                                                                                                                                                                                                                                                                                                                                                                                                                                                                                                                                         | BC130522.1;BC033697.1;M97639.1;AB209154.1                                                                                                                 | 68  |
| Hs00230170_m1 | INV | AKR1E2   | aldo-keto reductase family 1 member E2          | AKR1CL2;AKRDC1;LoopADR;hTSP;htAKR                             | XM_011519718.2;XM_011519720.2;XM_011519724.2;XM_017016743.1;NR_073125.1;XM_017016744.1;XM_011519722.2;NR_073126.1;XM_017016745.1;NR_073127.1;XM_011519729.2;NM_001040177.2;XM_011519719.2;XM_011519725.2;NM_001271021.1;NM_001271025.1;XM_011519715.2                                                                                                                                                                                                                                                                                                                                                                                                                                                          | DA006578.1;BC002862.2;AF263242.1;AB055603.1;AB040820.1;AB040821.1;AB040822.1;AK074211.1                                                                   | 65  |
| Hs00998517_m1 | INV | ACSS3    | acyl-CoA synthetase short-chain family member 3 | -                                                             | XM_011538740.2;XM_005269150.2;XM_005269151.4;NM_024560.2                                                                                                                                                                                                                                                                                                                                                                                                                                                                                                                                                                                                                                                       | BC015769.1;AK025616.1;AK074938.1;BC009317.2;AX764480.1;AX764482.1                                                                                         | 74  |
| Hs01548765_m1 | INV | SALL1    | spalt like transcription factor 1               | HEL-S-89;HSAL1;Sal-1;TBS;ZNF794                               | XM_006721241.3;XM_011523254.2;NM_00127892.1;NM_002968.2                                                                                                                                                                                                                                                                                                                                                                                                                                                                                                                                                                                                                                                        | EU668343.1;Y18265.1;AK295103.1                                                                                                                            | 78  |
| Hs00223297_m1 | INV | EPB41L4A | erythrocyte membrane protein band 4.1 like 4A   | EPB41L4;NBL4                                                  | XM_011543531.2;NM_022140.3;XM_011543530.1;XM_017009689.1;XM_011543533.1;XM_011543532.1                                                                                                                                                                                                                                                                                                                                                                                                                                                                                                                                                                                                                         | BC114632.1;AB030240.1;BC114942.1                                                                                                                          | 68  |
| Hs00988745_m1 | MTO | RIMS2    | regulating synaptic membrane exocytosis 2       | OBOE;RAB3IP3;RIM2                                             | XM_017014026.1;XM_006716698.3;XM_017014024.1;XM_017014030.1;XM_017014028.1;XM_017014018.1;XM_017014016.1;XM_017014022.1;XM_017014020.1;XM_017014010.1;NM_001100117.2;XM_017014043.1;XM_017014008.1;XM_017014041.1;XM_017014014.1;XM_017014012.1;XM_017014045.1;XM_017014035.1;NM_014677.4;XM_017014033.1;XM_017014006.1;XM_017014039.1;XM_005251106.3;XM_017014037.1;NM_001282881.1;XM_017014027.1;XM_017014025.1;XM_017014031.1;XM_017014029.1;XM_017014019.1;XM_017014017.1;XM_017014023.1;XM_017014021.1;XM_005251107.3;XM_011517395.2;XM_017014042.1;XM_017014011.1;XM_017014040.1;XM_017014009.1;XM_017014046.1;XM_017014015.1;XM_017014044.1;XM_017014013.1;XM_017014034.1;XM_017014032.1;XM_017014031.1 | AK308831.1;CR749374.1;CN361794.1;AB018294.1;AK126939.1;BC043144.2                                                                                         | 84  |
| Hs01114274_m1 | INV | IL24     | interleukin 24                                  | C49A;FISP;IL10B;MDA7;MOB5;ST16                                | XM_011509101.2;NM_006850.3;NM_001185156.1;XM_017000121.1;NM_001185157.1;NM_001185158.1                                                                                                                                                                                                                                                                                                                                                                                                                                                                                                                                                                                                                         | AY641440.1;BT007156.1;BC009681.1;U16261.1;AY641441.1;AW949784.1;BP222651.1                                                                                | 67  |
| Hs00223273_m1 | INV | POPDC2   | popeye domain containing 2                      | POP2                                                          | XM_005247698.3;NM_001308333.1;NM_022135.3                                                                                                                                                                                                                                                                                                                                                                                                                                                                                                                                                                                                                                                                      | AK377182.1;AF204173.1;AK377180.1;AK226022.1;AK377184.1;AK377183.1;AK377174.1;AK377178.1;BC026911.2;AK314819.1;BC044929.1                                  | 108 |
| Hs01087516_m1 | INV | LRRN3    | leucine rich repeat neuronal 3                  | FIGLERS;NLRR3;NLRR3                                           | NM_001099660.1                                                                                                                                                                                                                                                                                                                                                                                                                                                                                                                                                                                                                                                                                                 | AK001991.1                                                                                                                                                | 90  |
